# Supplementary material for: Improving the expression of taxadiene synthase to enhance the titer of taxadiene in Saccharomyces cerevisiae
Source: Royal Society of Chemistry journal article supplement (doi:10.1039/d4gc03079f), 2024-01-01
Supplement: d4gc03079f1.pdf [file d4gc03079f1.pdf]

## Supplementary Material

### Improving the expression of taxadiene synthase to enhance the titer of taxadiene in *Saccharomyces cerevisiae*

Chenglong Zhang<sup>a,b</sup>, Jia Wang<sup>a,b</sup>, Yi Shi<sup>ab</sup>, Nan Wu<sup>a,b</sup>, Xia Li<sup>a,b</sup>, Ying Wang<sup>a,b</sup>, Bingzhi

Li<sup>a,b</sup>, Wenhai Xiao<sup>a,b,c,d\*</sup>, Mingdong Yao<sup>a,b\*</sup>, Yingjin Yuan<sup>a,b</sup>

a. Frontier Science Center for Synthetic Biology and Key Laboratory of Systems Bioengineering

(Ministry of Education), School of Chemical Engineering and Technology, Tianjin University,

Tianjin 300072, China

b. Frontier Research Institute for Synthetic Biology, Tianjin University

c. School of Life Sciences, Faculty of Medicine, Tianjin University

d. Georgia Tech Shenzhen Institute, Tianjin University, Shenzhen 518071, China

**\*Correspondence:**

Mingdong Yao

Email: [mingdong.yao@tju.edu.cn](mailto:mingdong.yao@tju.edu.cn)

**Table S1. Plasmids used in this study.**

| Plasmid | Description                        | Source     |
|---------|------------------------------------|------------|
| pRS416  | shuttle vector plasmid,Amp; Ura    | This lab   |
| pRS426  | shuttle vector plasmid,Amp; Ura    | This lab   |
| pZCL096 | pRS416-CYC1t-GAL1p-t60TS-RFP-GPM1t | This study |
| pZCL106 | pRS416-CYC1t-GAL1p-t60TS-GPM1t     | This study |
| pZCL116 | pRS426-CYC1t-GAL1p-t60TS-GPM1t     | This study |

**Table S2 Primer used in this study.**

| Primer name | Sequence (5'-3')                                           |
|-------------|------------------------------------------------------------|
| PRB1-upF    | CTCTATTACTCGGTGCCCTAGG                                     |
| PRB1-upR    | cttacgatacctgagtattccacagttATTGTGCAGTGGACACGAGAGGA         |
| PRB1-downF  | aacggccttAacgacgtagtcgaAACTGGGGTAAGTGTGTCGACGTT            |
| PRB1-downR  | CAAGAATATCTCTCACTTGATCAAAGATTAATCGGTC                      |
| PEP4-upF    | GCTTGAAAGCATTATTGCCATTGGC                                  |
| PEP4-upR    | ctgagtattccacagttAATGTAGGAAACAAGCCAAGGAACC                 |
| PEP4-downF  | gaaacggccttAacgacgtagtcgaAAAGGATACTGAAAATGGCGGTGAAG        |
| PEP4-downR  | TCAAATTGCTTTGGCCAAACCAACC                                  |
| CYM1-upF    | ATGTTGCGGTTTCAGCGATTTGC                                    |
| CYM1-upR    | gtattccacagttAGGTGGAGTCTAAATAAACACCTCTTAAATTAGC            |
| CYM1-downF  | acgacgtagtcgaAAATTCAGGTGTTGAACCAACTACAGCAG                 |
| CYM1-downR  | CCTGTAACAGTATAACCAGTTTAAAGATGTT                            |
| YAP3-upF    | ATGACGCCTTCTAATATGGATGATAATACCAGC                          |
| YAP3-upR    | tacctgagtattccacagttAGGGACTCCTCGAACTGGAGATATACC            |
| YAP3-downF  | cgacgtagtcgaAAAGAATTACAAGATAAATTGTTAGAAAGTGAAAGGAACC       |
| YAP3-downR  | TCATTCATTCAAAGTAGCTTCCTCCACTAGA                            |
| t60TS-RFP-F | CTAATACTATAACATAACAATAATAAATGTCATCATCAACCGGTACTTCAAA<br>GG |
| t60TS-RFP-R | CCTTTTGAACGGGTCCGGAAACTTGGATAGGGTCAATATAGACC               |

**Table S3 The Codon-optimized sequences of genes involved in this study.**

| Genes                                                  | Sequences                                                                                                                                                                                                                                                                                                                                                                                                                                                                                                                                                                                                                                                                                                                                                                                                                                                                                                                                                                                                                                                                                                                                                                                                                                                                                                                                                                                                                                                                                                                                                                                                                                                                                                                                                                                                                                                                                                                                                                                                                                                                                                                                                                                                                                                                                                                                                                                                                                                                                                                               |
|--------------------------------------------------------|-----------------------------------------------------------------------------------------------------------------------------------------------------------------------------------------------------------------------------------------------------------------------------------------------------------------------------------------------------------------------------------------------------------------------------------------------------------------------------------------------------------------------------------------------------------------------------------------------------------------------------------------------------------------------------------------------------------------------------------------------------------------------------------------------------------------------------------------------------------------------------------------------------------------------------------------------------------------------------------------------------------------------------------------------------------------------------------------------------------------------------------------------------------------------------------------------------------------------------------------------------------------------------------------------------------------------------------------------------------------------------------------------------------------------------------------------------------------------------------------------------------------------------------------------------------------------------------------------------------------------------------------------------------------------------------------------------------------------------------------------------------------------------------------------------------------------------------------------------------------------------------------------------------------------------------------------------------------------------------------------------------------------------------------------------------------------------------------------------------------------------------------------------------------------------------------------------------------------------------------------------------------------------------------------------------------------------------------------------------------------------------------------------------------------------------------------------------------------------------------------------------------------------------------|
| <p><i>Tbt60TS</i> from<br/><i>Taxus brevifolia</i></p> | <p>atgtcatcatcaaccggacttcaaaagtagtatcagagacttcttaccatagtagatgatatccaagattgtctgtaactaccag<br/> gagatttggcatcacacacgaatacaaacattggagacacctttagagagtcttcatataccaggagaggccgatgaattggt<br/> cgtcaagatcaaagatatgttaacgcattaggtagcggtagatctcacctctgcctatgacacagcttgggtgctagattggccac<br/> aattctctgatggatctgaaaagcctaggttcctcaggcattaactgggtcttaacaatcaattgcaagacggtcatggggtata<br/> gagtctcactttctttagcagatattattgaactacaactcagtaatcgtcttctgtctgaaaaccggacactcacaggttca<br/> acagggtagcaggtcatagccgaaaattgaggttattaaacgaggaagatgagttatctcctgacttcaaatcatattcccagctt<br/> gttacgaaaagcgaaggcttgggtattattgacctacgactgccattcataaatactgtcaaccactagggagactaggttaact<br/> gacgtatcagctgccgccgataatccctgctaataatgtgaatgccttagaggattggaggaagtaagactggaacaaaatca<br/> tgagattcaatcaagacggatcattctgtctcactgcataactgctgctgtttgatgaataccggagatgagaagtgctttaca<br/> ttctaaacaacttattgataagttcggaggatgtgtccctgtatgtattctatcactgttggagaggttcttttagtcgacaacata<br/> gaacacttaggtattgtaggcactttaagcaggaaattaaggagcttggattatgtctacagacactggtcagaaaaggagaaatc<br/> gtgggtagagactcatttagaccagatttaaacaccacagcattgggattgagaacattaagatgcatgataaacgtttcttca<br/> gatgtttgaataattcaagacgagaacgtagattctttctctccggcagacacacgtcgaattaagatcagtagtaactgtt<br/> ttagagcctcagattggcctcccagacgaaaagccatggatgacgctaggaagttcgtgaacctacttagagagggcattgg<br/> caactaagatctactaacaacaaaatgtcaaggaaatcgaatacgtcgtttagtaccatggcatatgcaataccaaggtggag<br/> gcaaggctttacatagactcttatgacgataactatgtttggcagagaaagacattgtatagaatgccattttgctaaactcaaagtgtt<br/> ggaattagccaaattgattttaacatcgtacaatcattgaccaggaagaataaagtattgactagatggtggaaggaatcaggtat<br/> ggccgacataaaactcacaagacataggtagccgaggttacttctctcagctacttccagccagagtattctgctacaaggattg<br/> ccttcaaaaataggatgtttacaggtcttctgacgatatggcagacattttgccacttggacgaattgaagtcattaccaggag<br/> gtgtaagagatgggatacttcttggcagcaaataccagagtgtatgcaaacatgctttaaaggctgtttaaagttaatggaagaggt<br/> caacaacgatgtatgcaaaagcgaaggaagacatgttagctcacattagaaaacctggaggttatactttaaactgctacgttaa<br/> gaaaggagtggttagaggctggttacatccctacttttaggaatattgaaaacctacgctatttcagtcgggttaggacctgtacat<br/> tgacgctatctattgatgggagagttagtaaggacgacgtttagaaaaaggccactacccttaataatgttcgagttgtctcatt<br/> gtcatggagattgacaaacgacaccaagacttatcaggccgagaaggctagaggacaacaagcatctggaatcgcattgtatcatga<br/> aggataaccagggtccacagaagagacgctatcaagcatatttgcagagtagttgacaggccttaaaagagcctcattcgag<br/> tatttcaagccttcaatgacatacctatgggtgttaaatcattatctcaactaagattatgcttcaagatatttacaatcatagatgg<br/> atcggattgtcaacgaagagataaaagactatataaggaaggtctatattgacctatccaagttaa</p> |

yZCL080

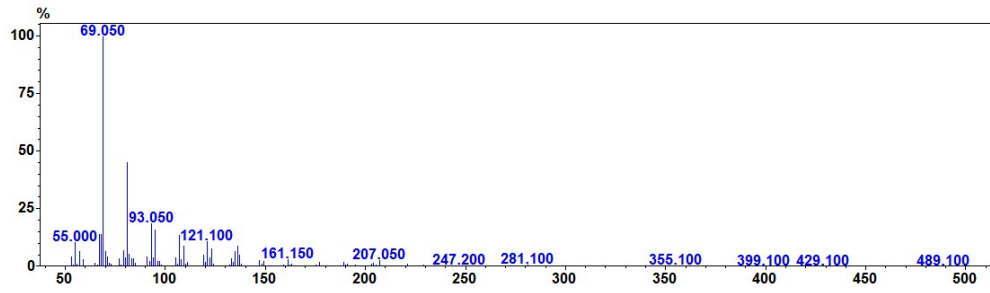

GGOH Standard

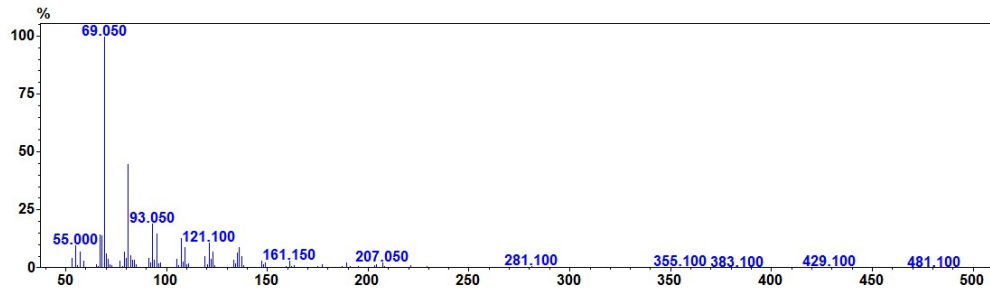

Fig. S1 The MS results for GGOH standard and the production of the strain yZCL080 were also showed.

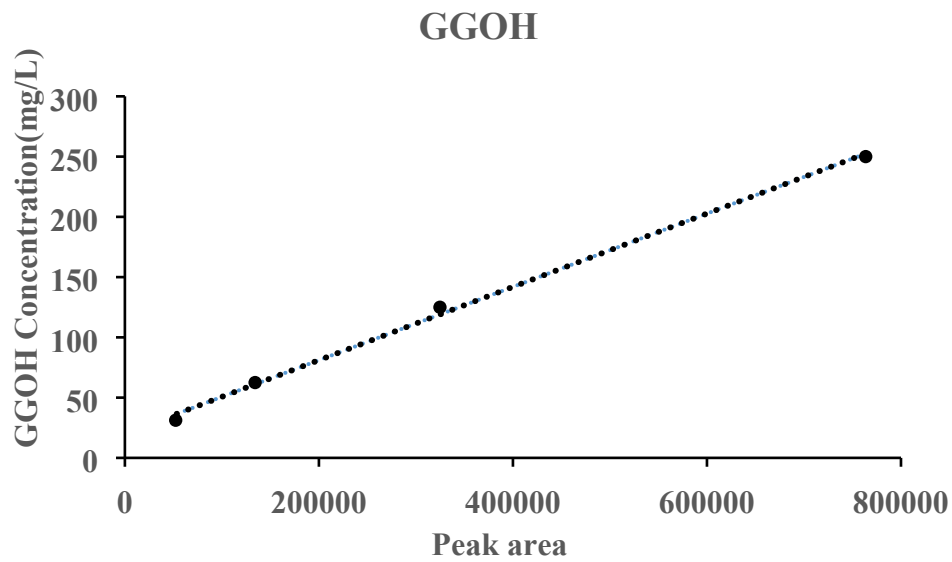

Fig. S2 Calibration curve of GGOH concentration.

D3-TXE, 1, f1d  
D3-TXE CDCl3 1H

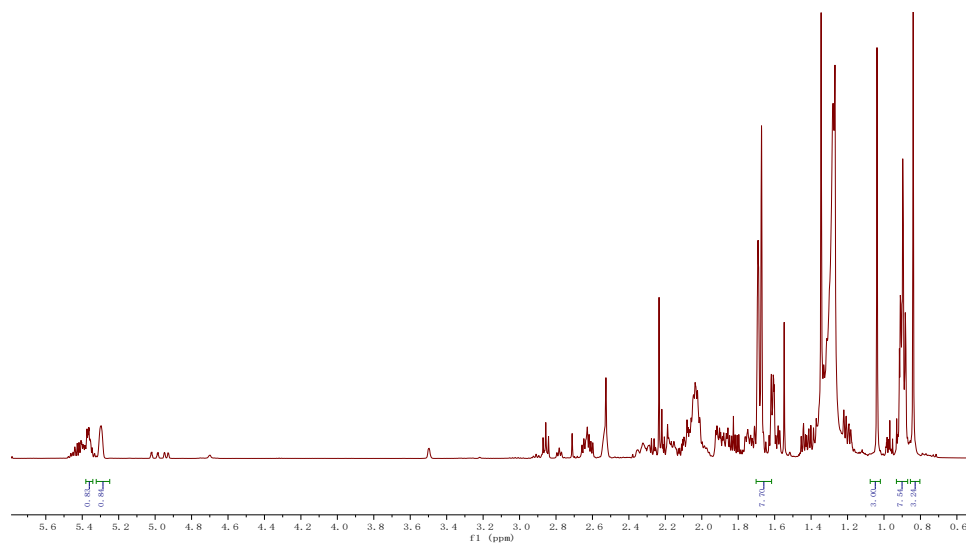

**Fig. S3 <sup>1</sup>H NMR spectra of purified taxadiene samples**

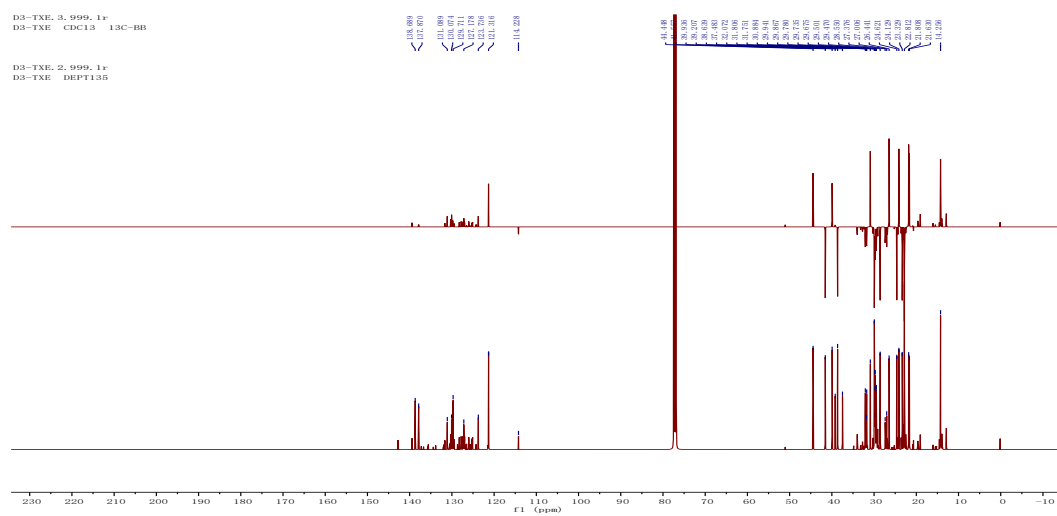

**Fig. S4 <sup>13</sup>C NMR spectra of purified taxadiene samples**

**Table S4 The <sup>13</sup>C NMR data of purified samples were compared with the literature data<sup>1</sup>**

| No | Ref1.    | Expl.     |
|----|----------|-----------|
| 1  | 44.2(d)  | 44.30(d)  |
| 2  | 28.4(t)  | 28.41(t)  |
| 3  | 39.8(d)  | 39.79(d)  |
| 4  | 138.1(s) | 138.53(s) |
| 5  | 121.3(d) | 121.16(d) |
| 6  | 22.7(t)  | 22.70(t)  |
| 7  | 38.5(t)  | 38.50(t)  |
| 8  | 37.3(s)  | 37.34(s)  |
| 9  | 41.4(t)  | 41.41(t)  |
| 10 | 24.5(t)  | 24.62(t)  |
| 11 | 137.5(s) | 137.71(s) |
| 12 | 129.3(s) | 129.92(s) |
| 13 | 29.6(t)  | 29.80(t)  |
| 14 | 23.3(t)  | 23.19(t)  |
| 15 | 38.9(s)  | 39.06(s)  |
| 16 | 30.6(q)  | 30.74(q)  |
| 17 | 26.1(q)  | 26.30(q)  |
| 18 | 21.2(q)  | 21.49(q)  |
| 19 | 21.5(q)  | 21.67(q)  |
| 20 | 23.9(q)  | 23.99(q)  |

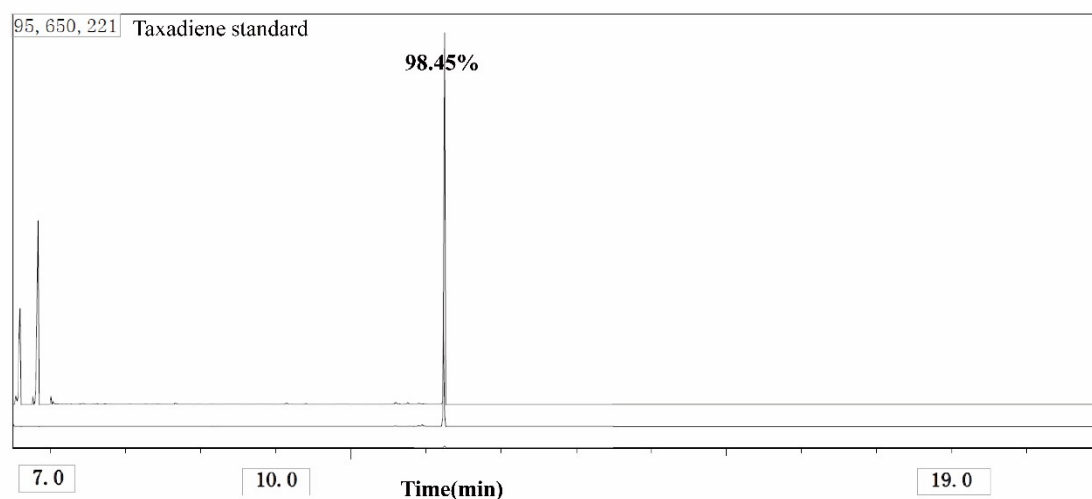

**Fig. S5 Purity analysis of taxadiene standard by gas chromatography. The solvent peak appears around 7min.**

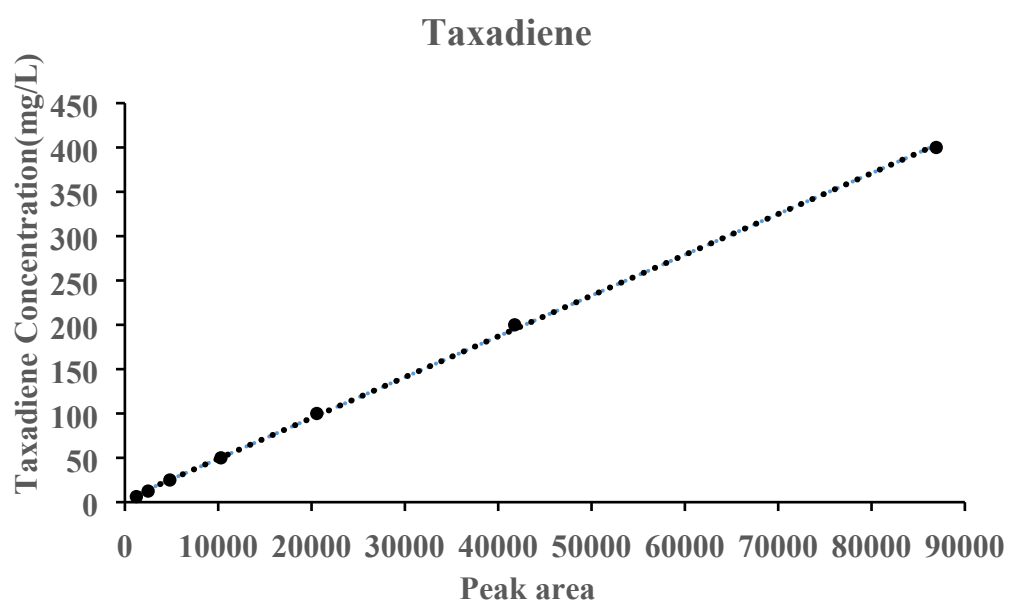

**Fig. S6 Calibration curve of taxadiene concentration**



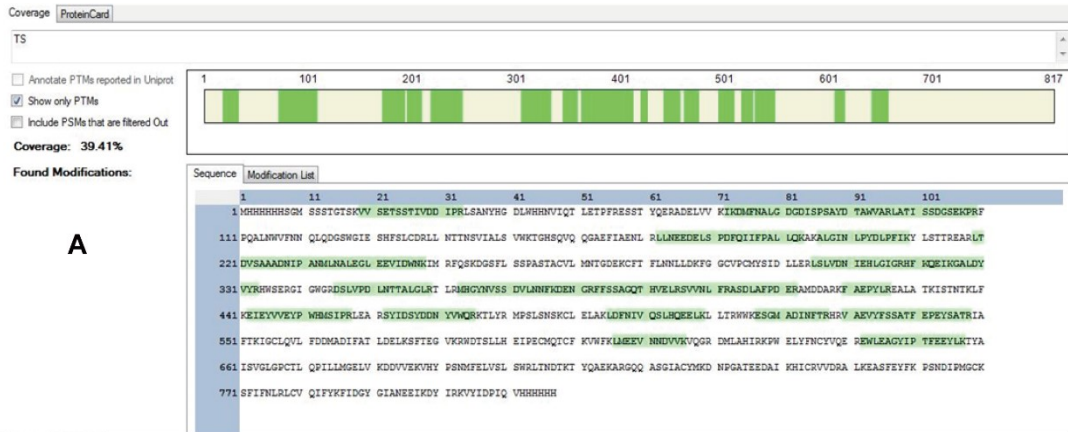

A

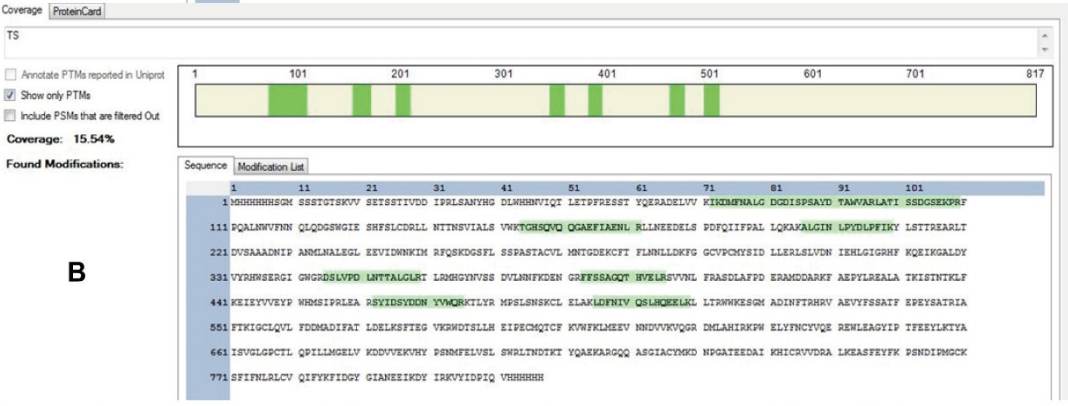

B

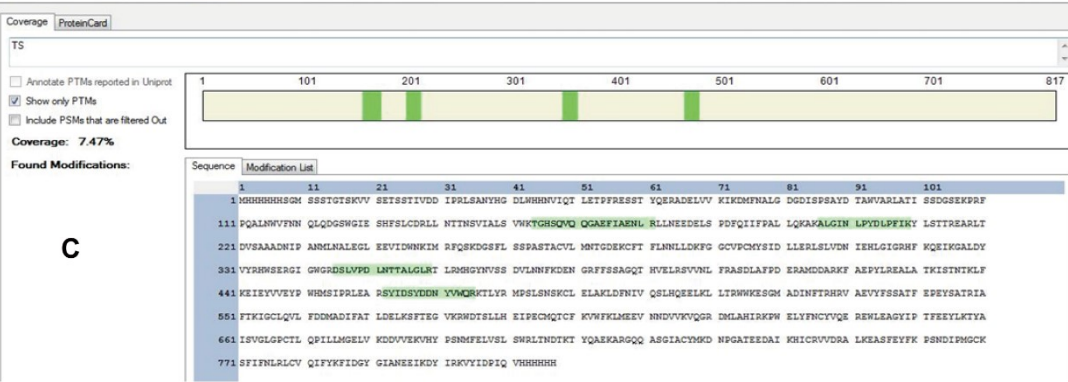

C

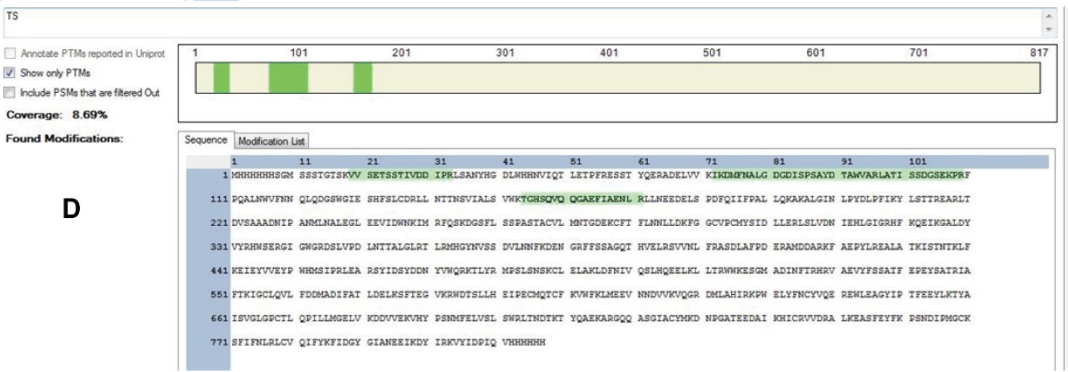

D

**Fig. S7 Comparative analysis of mass spectrometry results of TS protein.** The four protein bands in the SC-TS sample are numbered 1, 2, 3, and 4 from top to bottom, and the protein spectrum segment of each protein band has a corresponding coverage range. **(A)** The first protein band (about 93KDa in size) in SDS-PAGE was detected by TS full-length mass spectrometry. **(B)** The second protein band (about 53KDa in size) in SDS-PAGE was detected by mass spectrometry. **(C)** The third protein strip (about 35KDa in size) in SDS-PAGE was used to detect the matching results of peptide by mass spectrometry. **(D)** The fourth protein band (about 15KDa in size) in SDS-PAGE was detected by mass spectrometry.

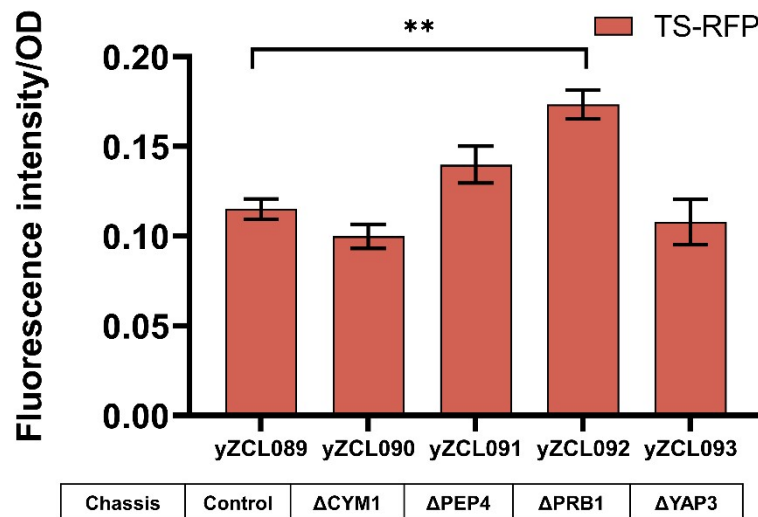

**Fig. S8 Effect of endogenous protease knockout on TS expression.** The single-copy pZCL096 plasmid carrying the TS-RFP fusion expression gene was introduced into control strains, and endogenous proteases PEP4, CYM1, YAP3, and PRB1 single knockout strains and yZCL089, yZCL090, yZCL091, yZCL092, and yZCL093 were successfully constructed.

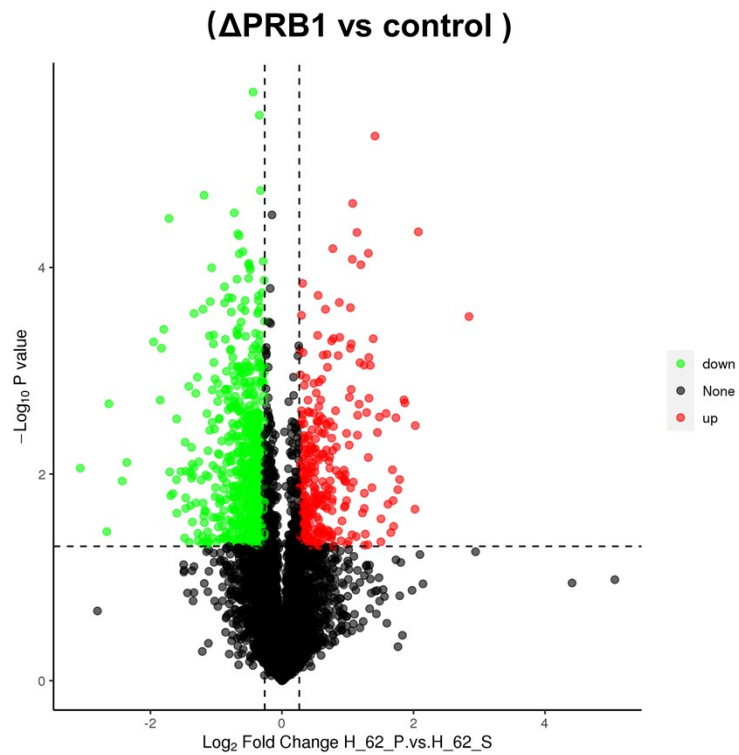

**Fig. S9 Differential protein volcano map between  $\Delta$ PRB1 and control group.** The horizontal coordinate indicates the difference multiple of the differential protein (log<sub>2</sub> value), the vertical axis indicates the *P*-value (-log<sub>10</sub> value), the black represents the non-significantly different protein, the red represents the up-regulated protein, and the green represents the down-regulated protein.

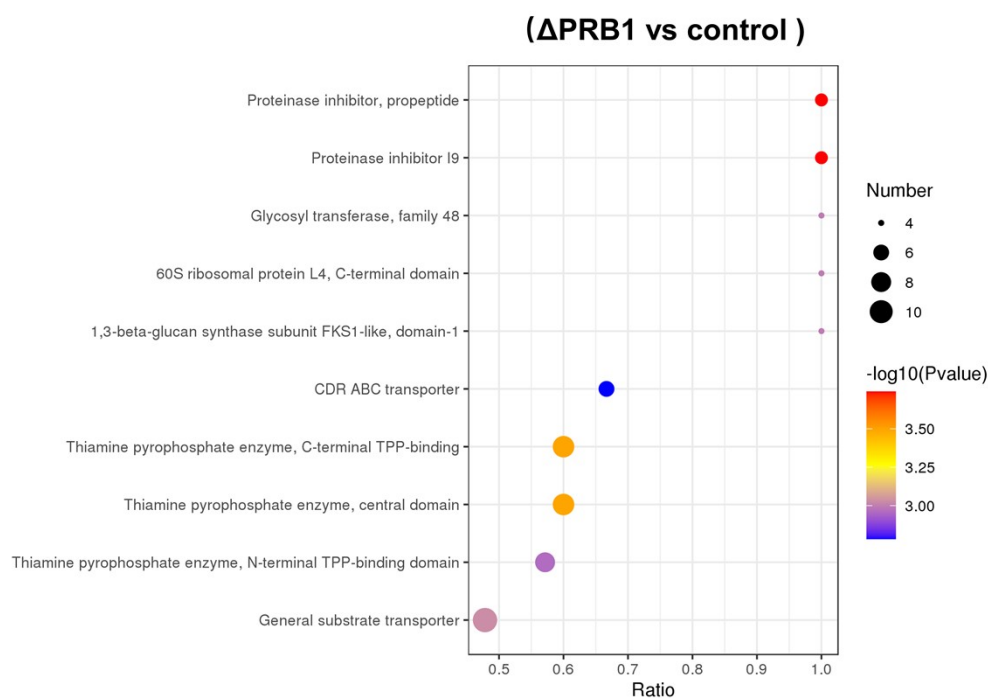

**Fig. S10 Bubble map of IPR (domain) enrichment analysis.** The horizontal coordinate is the ratio of the number of different proteins in the corresponding domain to the total number of proteins identified in the domain. The color of the dot represents the  $p$ -value of the hypergeometric test. The redder the color, the smaller the  $p$ -value, indicating the greater the reliability and statistical significance of the test. The size of the dot represents the number of different proteins in the corresponding domain, and the larger the dot, the more different proteins in that domain.

**Ref 1.** Q. Jin, D. C. Williams, M. Hezari, R. Croteau and R. M. Coates, *J. Org. Chem.*, 2005, 70, 4667–4675.
